# Supplementary material for: Insight into vibrational circular dichroism of proteins by density functional modeling
Source: Royal Society of Chemistry journal article supplement (doi:10.1039/c7cp08016f), 2018-01-01
Supplement: c7cp08016f1.pdf [file c7cp08016f1.pdf]

*Supplementary Information*

**Insight into Vibrational Circular Dichroism of Proteins by Density Functional Modeling**

**Jiří Kessler, Valery Andrushchenko, Josef Kapitán and Petr Bouř**

**Contents**

[\*\*Figure S1.\*\*](#)  $\alpha$ -lactalbumin VCD and IR spectra simulated with fragments of different sizes.

[\*\*Figure S2.\*\*](#) Concanavalin A IR and VCD spectra simulated with and without contact fragments.

[\*\*Figure S3.\*\*](#) Simulated and experimental  $\alpha$ -lactalbumin spectra, measurement in D<sub>2</sub>O.

[\*\*Figure S4.\*\*](#)  $\alpha$ -lactalbumin spectra simulated individual protein parts.

[\*\*Figure S5.\*\*](#) Examples of concanavalin  $\beta$ -strand vibrational modes

[\*\*Figure S6.\*\*](#) Deuterated  $\alpha$ -lactalbumin spectra simulated separately for the  $\alpha$ -helical and  $\beta$ -sheet parts.

[\*\*Figure S7.\*\*](#) VCD  $\alpha$ -lactalbumin spectra simulated with the APT model.

[\*\*Figure S8.\*\*](#)  $\alpha$ -lactalbumin IR and VCD spectra calculated using the TDC model.

[\*\*Figure S9.\*\*](#) IR and VCD spectra of human and hen egg white lysozyme.

[\*\*Figure S10.\*\*](#) Experimental VCD and IR spectra of human and hen egg white lysozyme in D<sub>2</sub>O.

[\*\*Figure S11.\*\*](#) IR and VCD spectra of concanavalin A simulated with the TDC correction.

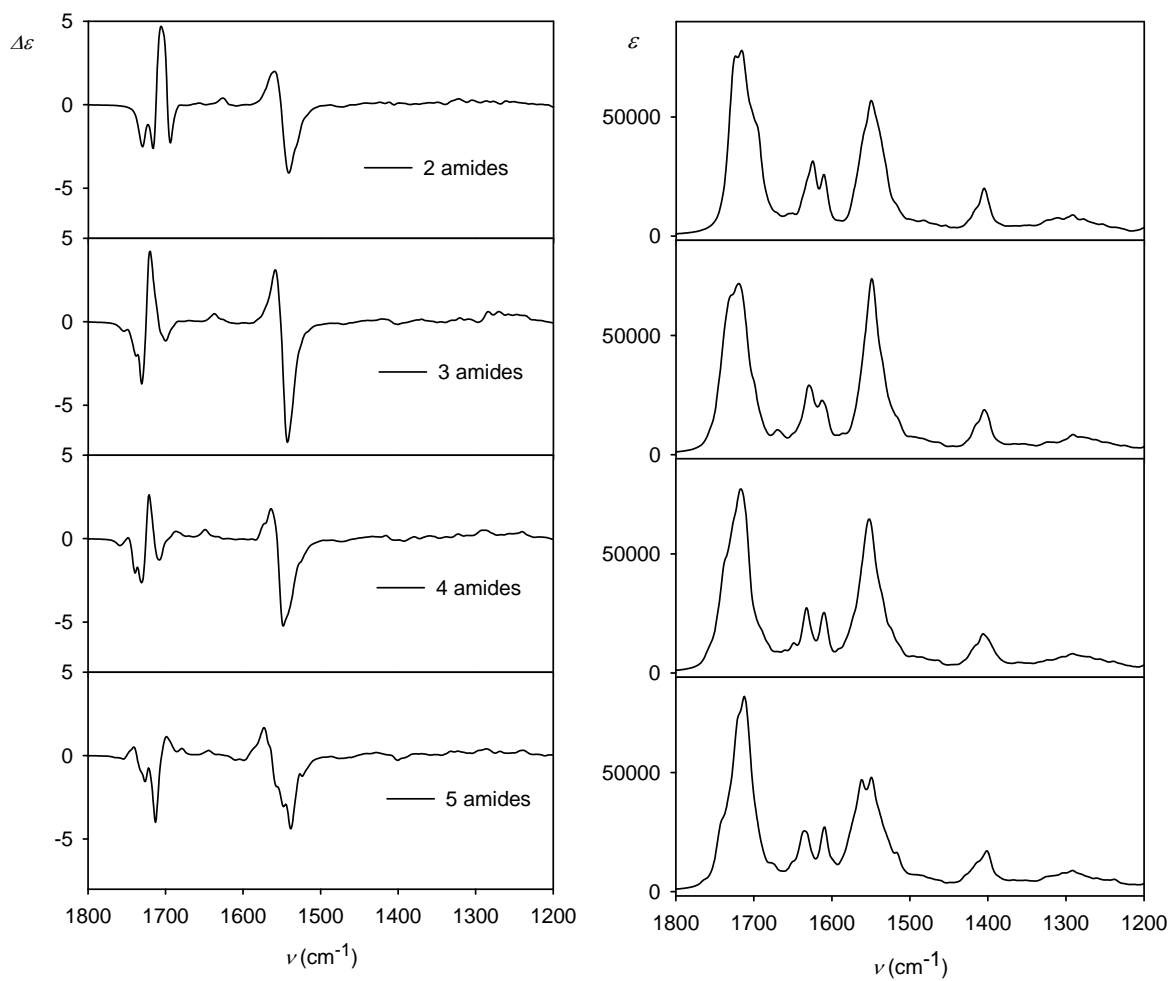

**Figure S1.** Lactalbumin VCD and IR spectra simulated with fragments of different sizes.

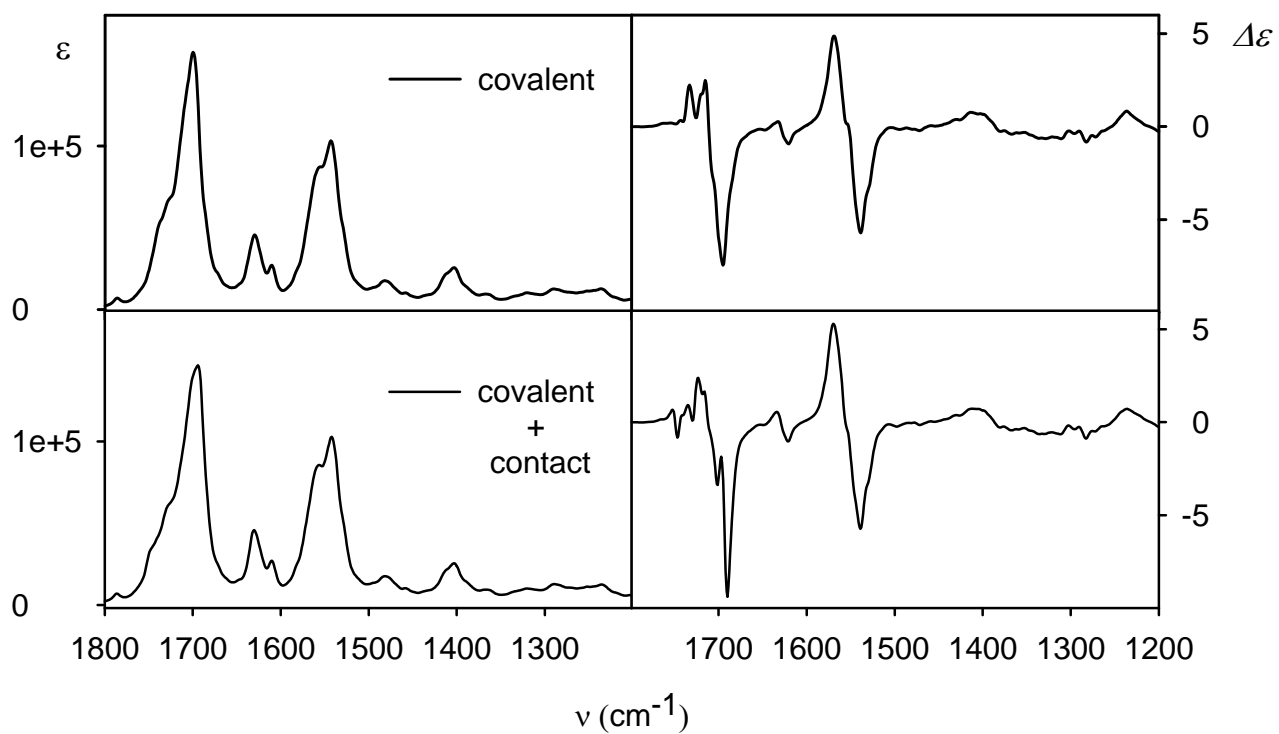

**Figure S2.** Concanavalin A IR and VCD spectra simulated with covalent fragments and when “contact” fragments across peptide chains were added.

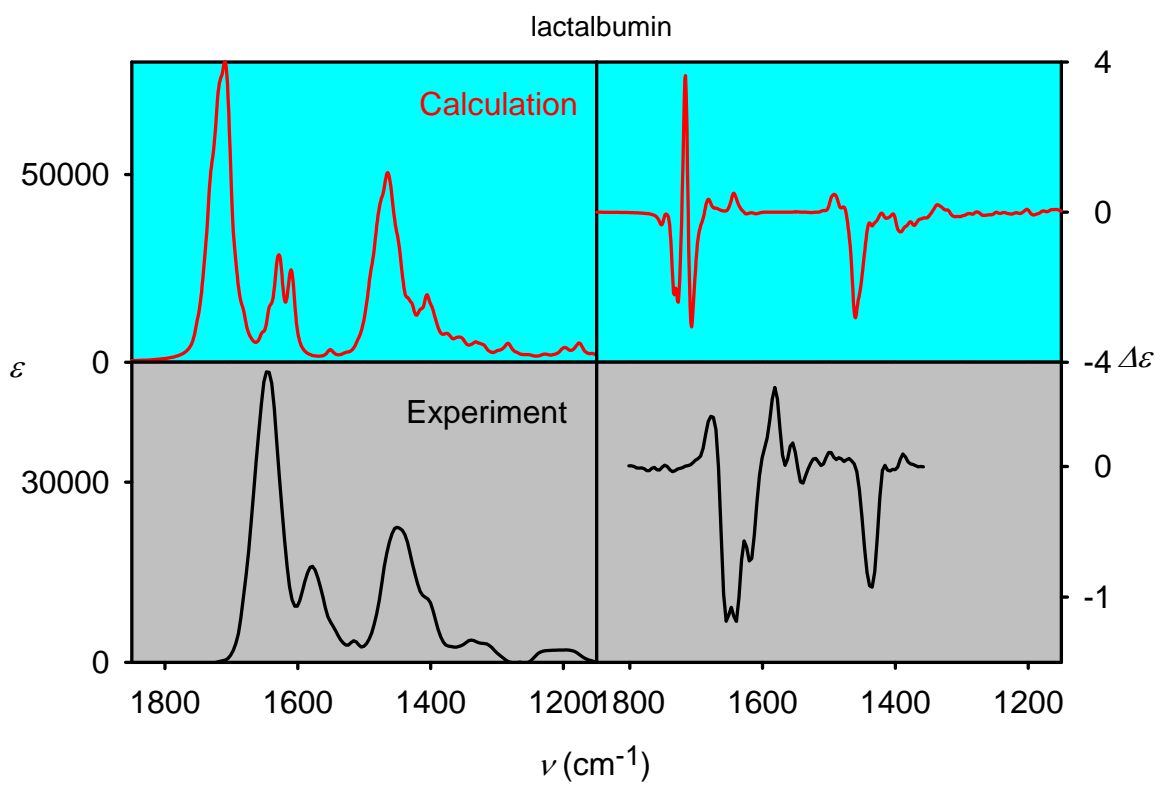

**Figure S3.** Simulated and experimental  $\alpha$ -lactalbumin spectra, measurement in D<sub>2</sub>O.

Calculated lactalbumin spectra, individual contributions

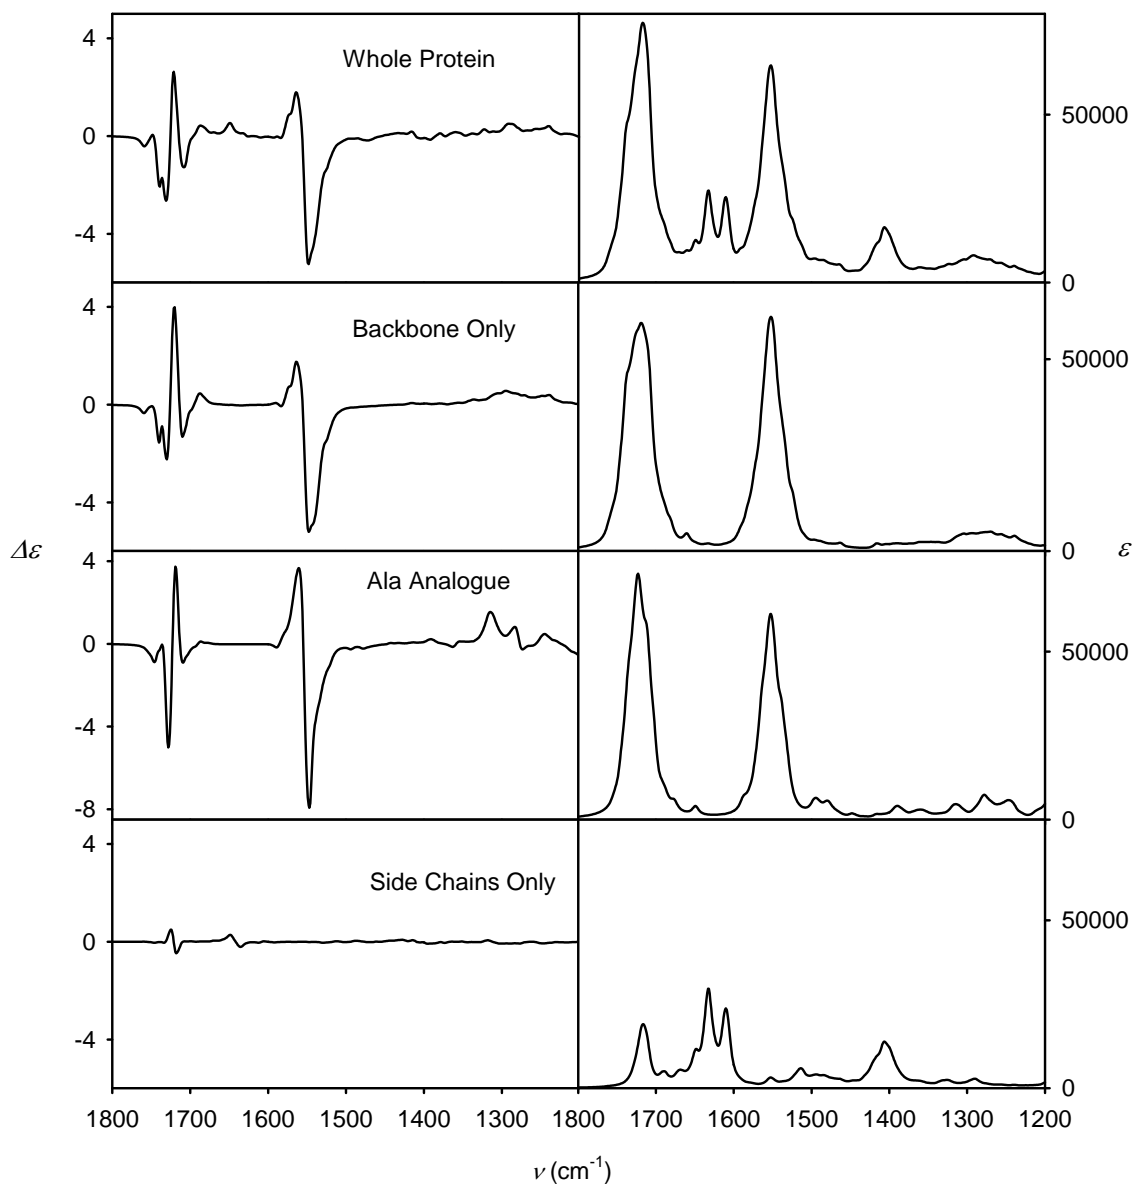

**Figure S4.**  $\alpha$ -lactalbumin spectra simulated for the whole protein, signal from the backbone only, the all-Ala analogue, and signal from the side chains.

1696  $\text{cm}^{-1}$ :

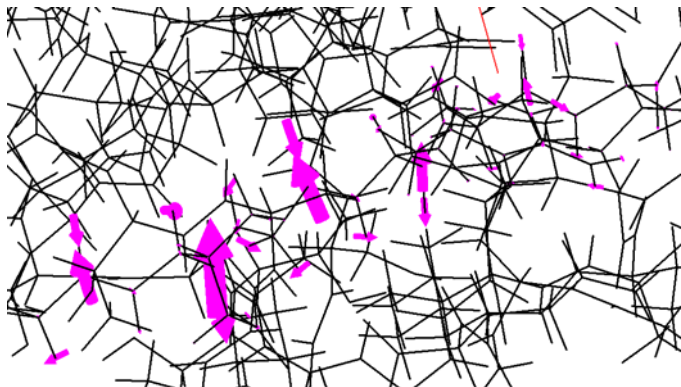

1570  $\text{cm}^{-1}$ :

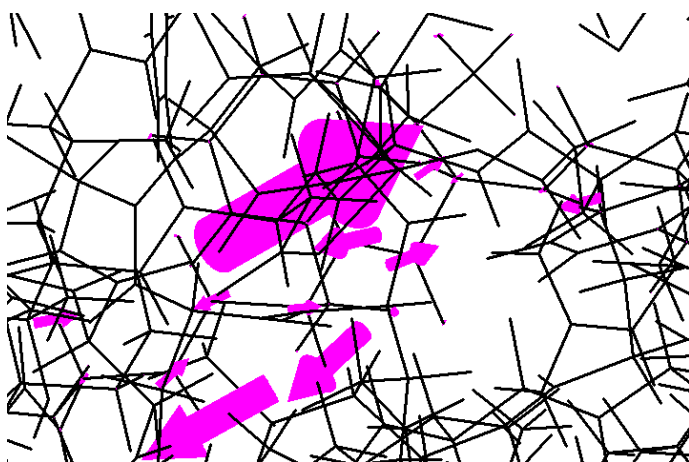

1526  $\text{cm}^{-1}$ :

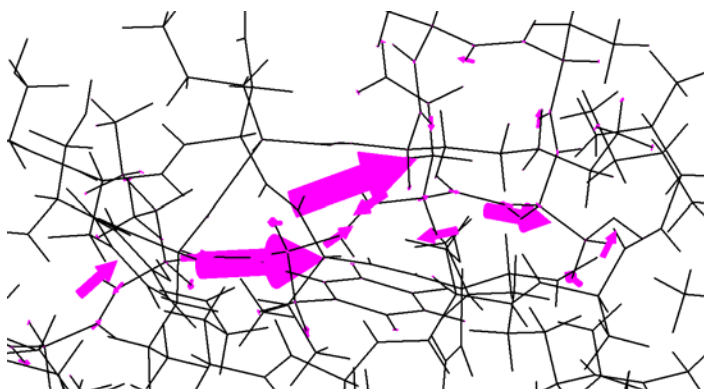

**Figure S5.** Examples of concavalin  $\beta$ -strand vibrational modes, 1696  $\text{cm}^{-1}$  (amide I, out of phase “+” C=O stretching), 1570 and 1526  $\text{cm}^{-1}$  (amide II, most visible is the in-phase NH bending).

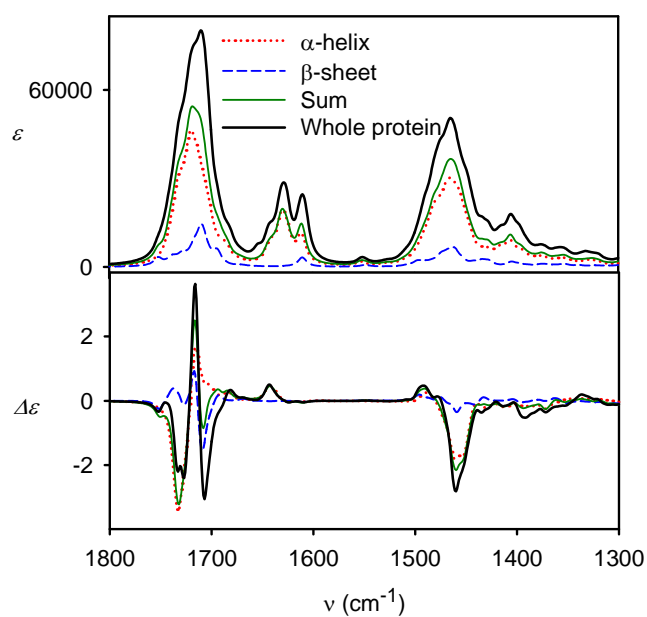

**Figure S6.** Absorption and VCD spectra of deuterated  $\alpha$ -lactalbumin, simulated separately for the whole protein, and  $\alpha$ -helical and  $\beta$ -sheet parts.

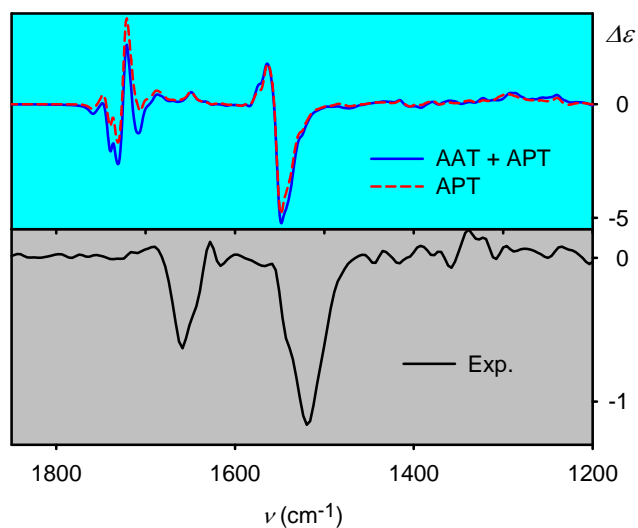

**Figure S7.** VCD  $\alpha$ -lactalbumin spectra simulated with both the AAT and APT contributions, with the APT part only, and experiment.

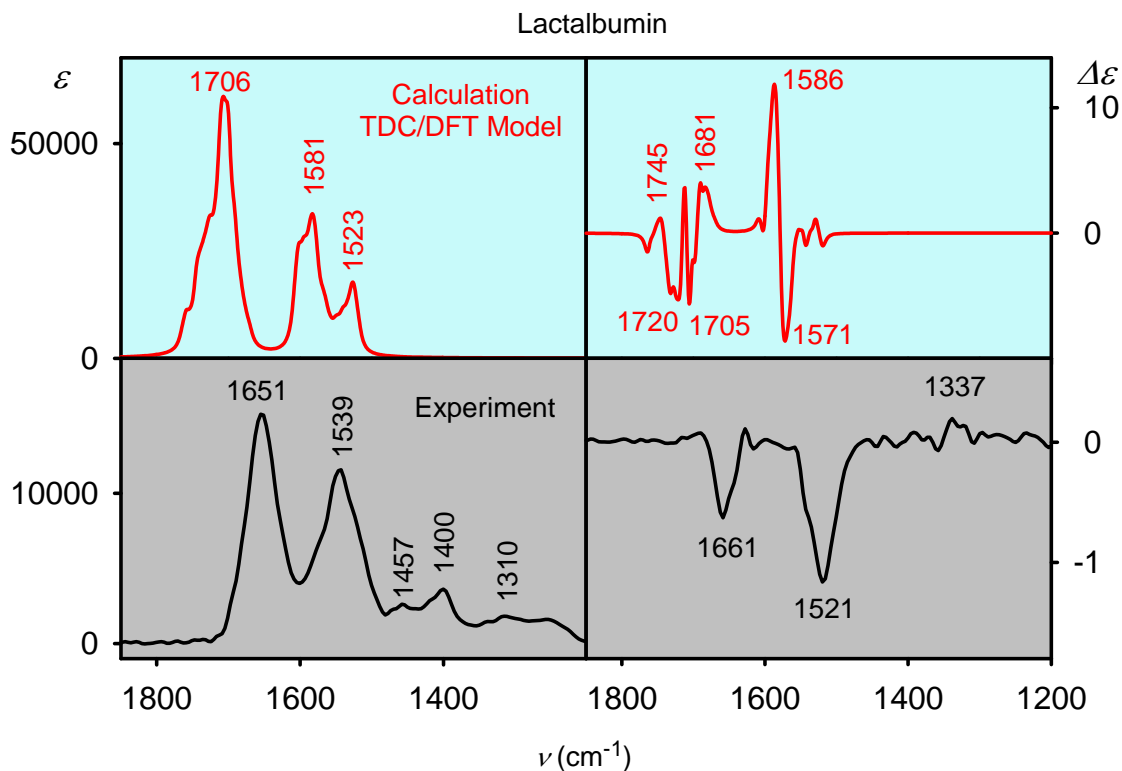

**Figure S8.** (Top)  $\alpha$ -lactalbumin IR and VCD spectra calculated using the TDC model (DFT parameters) and (bottom) the experiment.

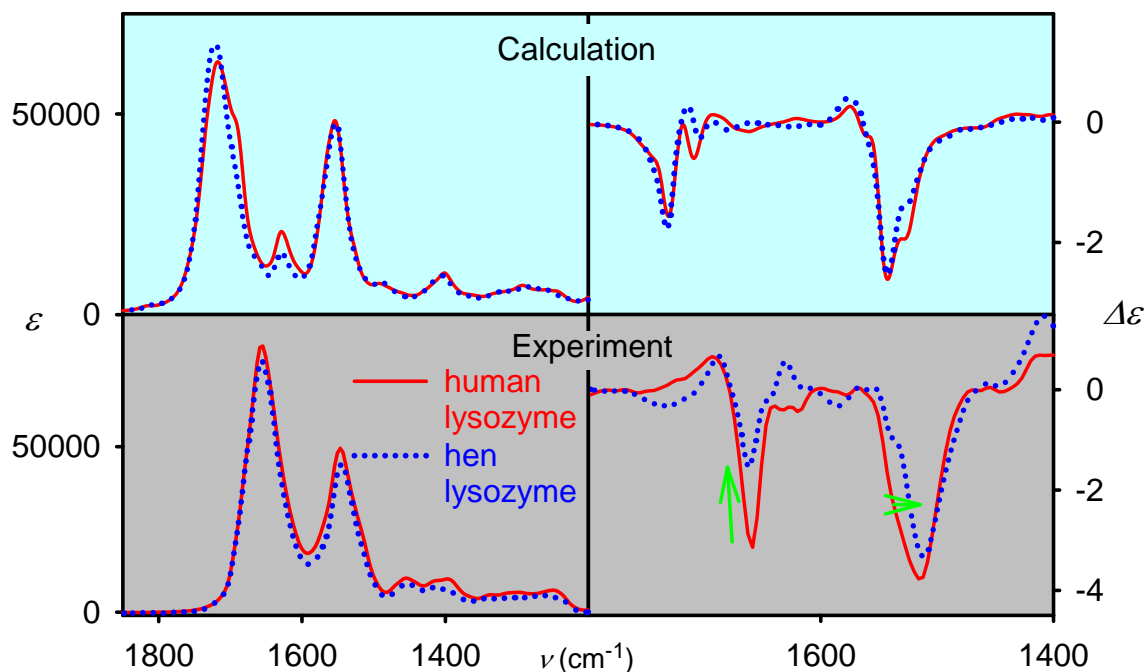

**Figure S9.** IR and VCD spectra of human and hen egg white lysozyme, simulation (TDC correction not applied) and experiment.



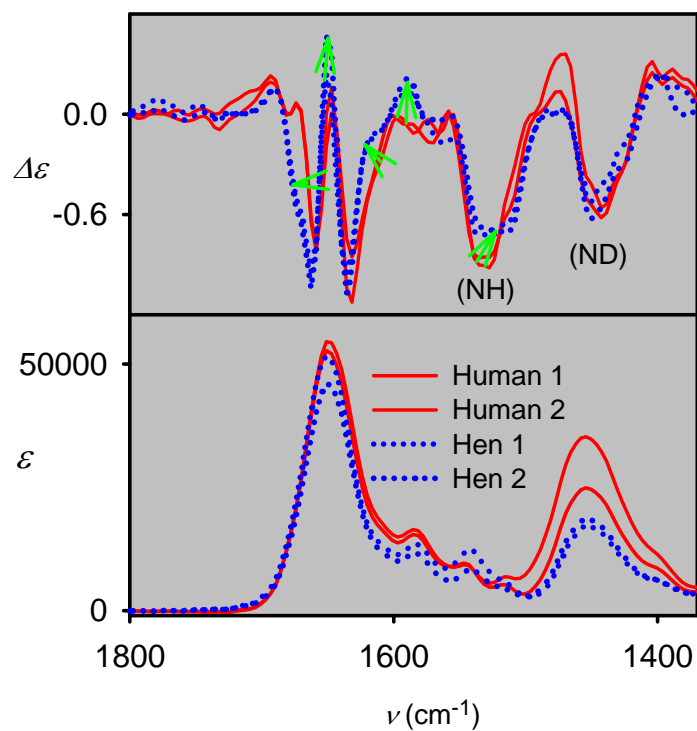

**Figure S10.** Experimental VCD and IR spectra of human and hen egg white lysozyme in  $\text{D}_2\text{O}$ , two independent measurements for each protein. Because of incomplete  $\text{H} \leftrightarrow \text{D}$  exchange, amide II (NH) is still visible around  $1530 \text{ cm}^{-1}$ . Around  $1460 \text{ cm}^{-1}$  the  $\text{D}_2\text{O}$  absorption is difficult to subtract.

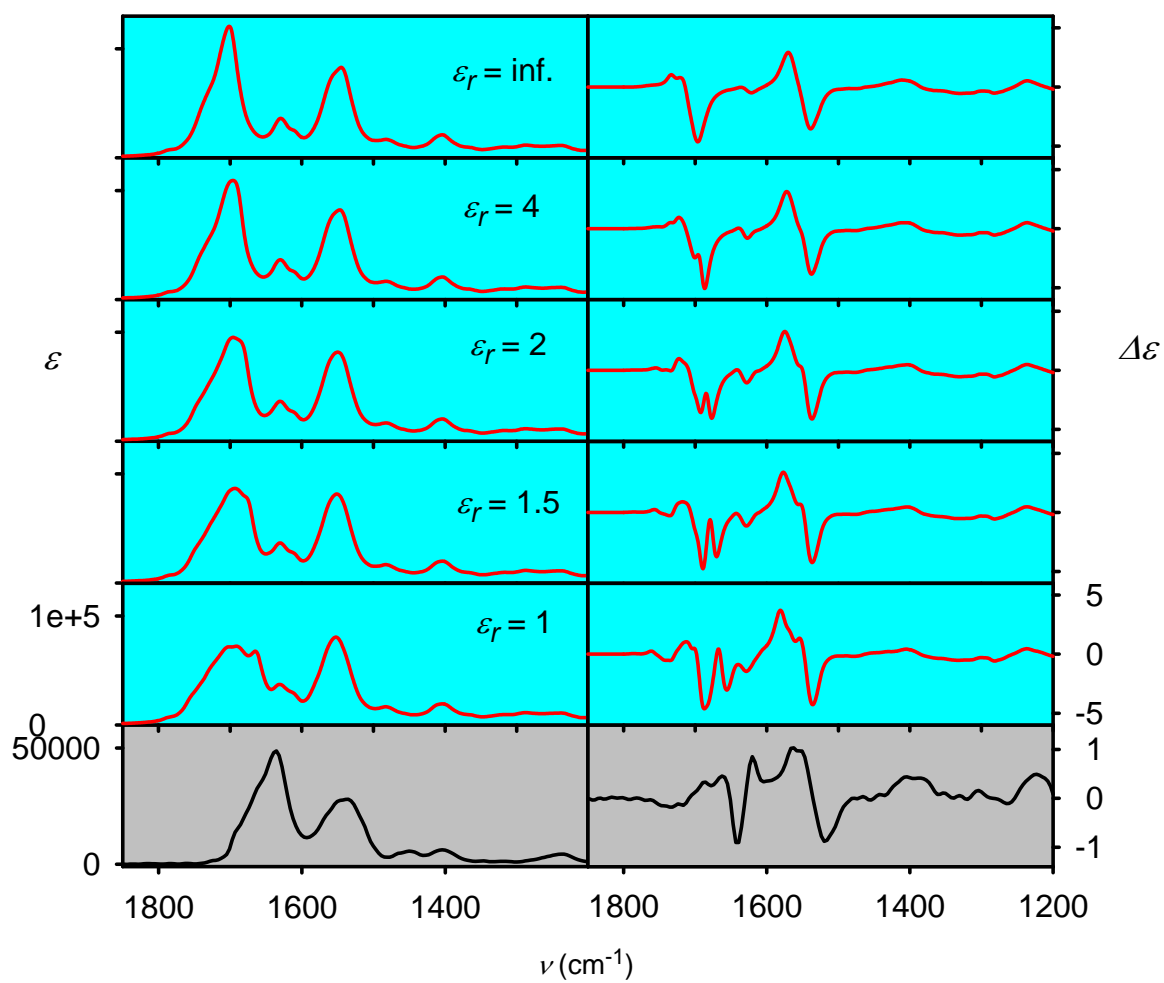

**Figure S11.** IR and VCD spectra of concanavalin A simulated with the TDC correction, at various values of the dielectric constant; the experiment is at the bottom.
